# Supplementary material for: LncRNA MALAT1 contributes to non-small cell lung cancer progression via modulating miR-200a-3p/programmed death-ligand 1 axis
Source: PubMed Central journal article supplement — Int J Immunopathol Pharmacol. 2019 Jun 26;33:2058738419859699. doi: 10.1177/2058738419859699 (PMC6595645; doi:10.1177/2058738419859699), 2019-06-26
Supplement: Supplementary_Materials.pdf [file Supplementary_Materials.pdf]

**The sequences of the primers used in this study:**

MALAT1 forward: GCATTTTGGGATGGTCTTAA

MALAT1 reverse: CAGCGGTACACTCCTTCTCT

$\beta$ -actin forward: TTCGAGCAAGAGATGGCCA

$\beta$ -actin reverse: TACATGGTGGTGCCGCC

**The sequences of the shRNAs used in this study:**

MALAT1 shRNA sequence: TCCACTTGATCCCAACTCATC

Scramble shRNA sequence: TCCTAAGGTTAAGTCGCCCTC
